# Supplementary material for: Lipocalin-2 is increased in progressive multiple sclerosis and inhibits remyelination
Source: PubMed Central journal article supplement — Neurol Neuroimmunol Neuroinflamm. 2016 Jan 7;3(1):e191. doi: 10.1212/NXI.0000000000000191 (PMC4708925; doi:10.1212/nxi.0000000000000191), 2016-01-07
Supplement: supp_3.1.e191_Table_e-1_and_figure_e-1.pdf [file supp_3.1.e191_Table_e-1_and_figure_e-1.pdf]

**Table e-1.** Demographic data of patients with MS and controls.

|                                                             | <b>SC</b> | <b>INDC</b> | <b>RRMS</b>    | <b>SPMS</b>    | <b>PPMS</b>  |
|-------------------------------------------------------------|-----------|-------------|----------------|----------------|--------------|
| <b>Number of patients</b>                                   | 39        | 11          | 75             | 49             | 23           |
| <b>Female/Male (%)</b>                                      | 67/33     | 73/27       | 64/36          | 57/43          | 43/57        |
| <b>Mean age<sup>a</sup> (years)</b>                         | 36        | 57          | 38             | 53             | 52           |
| <b>(Range)</b>                                              | (19-61)   | (29-77)     | (21-73)        | (28-77)        | (36-70)      |
| <b>Mean expanded disability status scale (Range)</b>        | NA        | NA          | 2.4<br>(0-7.5) | 4.8<br>(2.5-8) | 3.3<br>(1-6) |
| <b>Mean Disease duration, (Range)</b>                       | NA        | NA          | 6.66<br>(1-41) | 20.6<br>(1-54) | 7<br>(1-28)  |
| <b>Sampled during relapse/remission</b>                     | NA        | NA          | 56/19          | NA             | NA           |
| <b>Oligoclonal bands (+/-/NA)</b>                           | 0/28/11   | 2/7/2       | 59/15/1        | 37/11/1        | 17/5/1       |
| <b>Mean CSF mononuclear cells/<math>\mu</math>L (Range)</b> | 1.7 (0-6) | 8.4 (0-78)  | 10.1 (0-90)    | 4.2 (0-16)     | 3.1 (0-12)   |

Abbreviations: SC = symptomatic control; INDC = inflammatory neurological disease control; RRMS = relapsing remitting multiple sclerosis; SPMS = secondary progressive multiple sclerosis; PPMS = primary progressive multiple sclerosis; NA = not analyzed.

<sup>a</sup> Age refers to patient age at sampling time point.

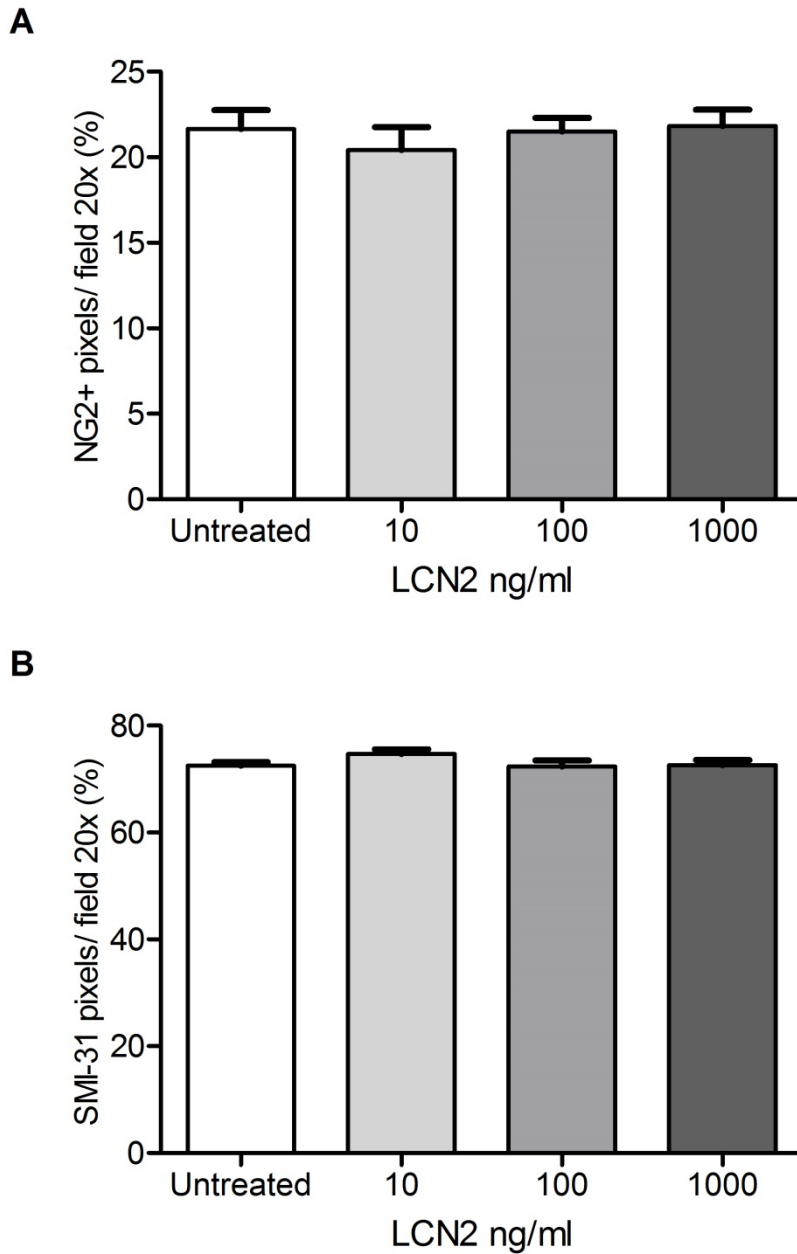

**Figure e-1: No effect of LCN2 on oligodendrocyte progenitor cells or axonal density.**

Quantification of immunochemical data from untreated myelinating cultures (28DIV) or after treatment with 10, 100 or 1000 ng/ml of LCN2 shows no significant effect on oligodendrocyte progenitor cells (A) or axonal density (B). Values plotted as mean  $\pm$  SD (n=3).
